# Supplementary material for: Room-temperature synthesis of Ni1−xFex (oxy)hydroxides: structure–activity relationship for the oxygen evolution reaction
Source: Royal Society of Chemistry journal article supplement (doi:10.1039/c9se00701f), 2019-12-05
Supplement: c9se00701f1.pdf [file c9se00701f1.pdf]

## **Room-Temperature Synthesis of $\text{Ni}_{1-x}\text{Fe}_x$ (Oxy)hydroxides: Structure-Activity Relationship over Oxygen Evolution Reaction**

Xiaodong Yan,<sup>a,\*</sup> Qing-Tao Hu,<sup>a</sup> Wen-Da Zhang,<sup>a</sup> Tao Li,<sup>a</sup> Haiyan Zhu,<sup>a</sup> Zhi-Guo Gu<sup>a,b,\*</sup>

<sup>a</sup> Key Laboratory of Synthetic and Biological Colloids, Ministry of Education, School of Chemical and Material Engineering, Jiangnan University, Wuxi 214122, China

<sup>b</sup> International Joint Research Center for Photoresponsive Molecules and Materials, School of Chemical and Material Engineering, Jiangnan University, Wuxi 214122, China

Corresponding author:

\*E-mail addresses: [xiaodong.yan@jiangnan.edu.cn](mailto:xiaodong.yan@jiangnan.edu.cn) (X. Yan); [zhiguogu@jiangnan.edu.cn](mailto:zhiguogu@jiangnan.edu.cn) (Z.-G. Gu)

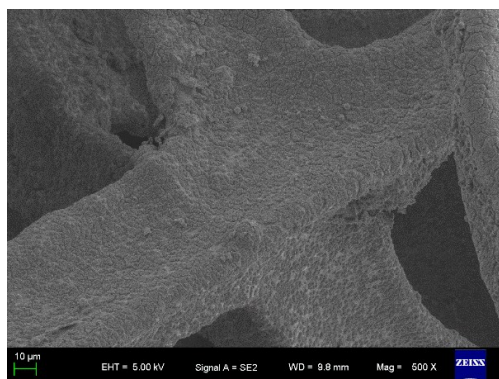

Figure S1 SEM image of Fe<sub>0.3</sub>Ni<sub>0.7</sub> hydroxides.

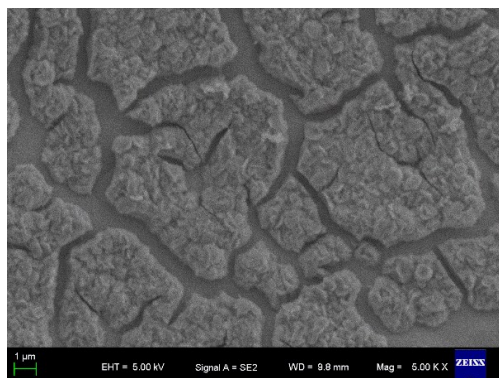

Figure S2 Magnified SEM image of Fe<sub>0.3</sub>Ni<sub>0.7</sub> hydroxides.

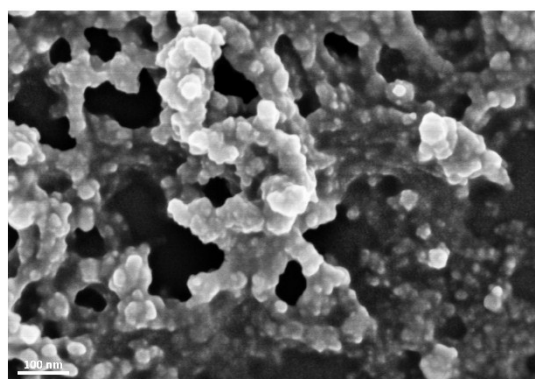

Figure S3 SEM image of Ni(OH)<sub>2</sub>.

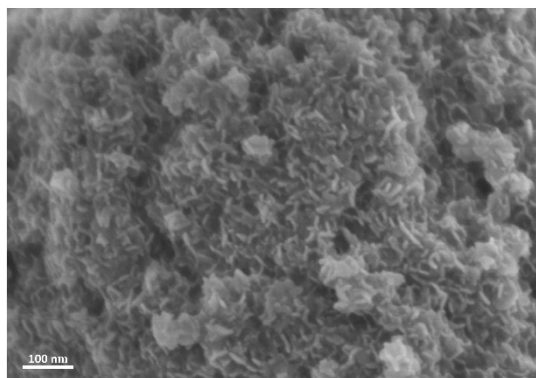

Figure S4 SEM image of Fe<sub>0.5</sub>Ni<sub>0.5</sub> hydroxides.

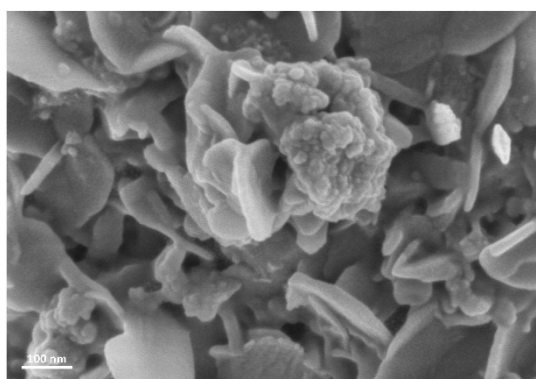

Figure S5 SEM image of Fe<sub>0.7</sub>Ni<sub>0.3</sub> oxyhydroxides.

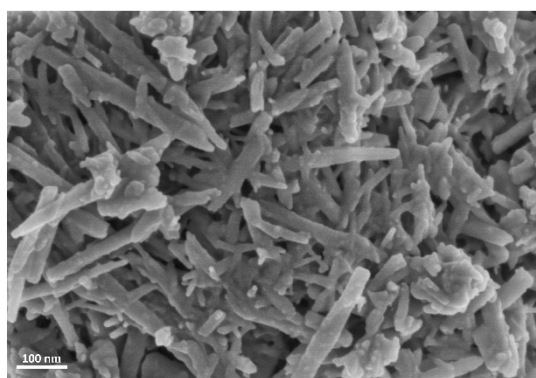

Figure S6 SEM image of FeOOH.

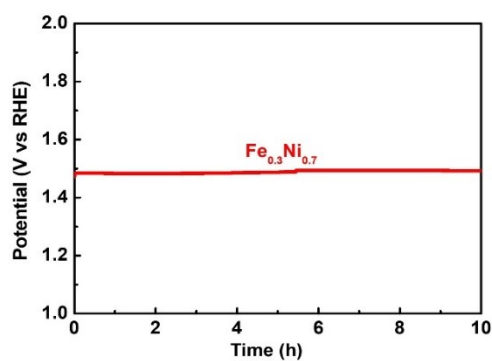

Figure S7 Chronopotentiometric potential-time profile of  $\text{Fe}_{0.3}\text{Ni}_{0.7}$  hydroxides.

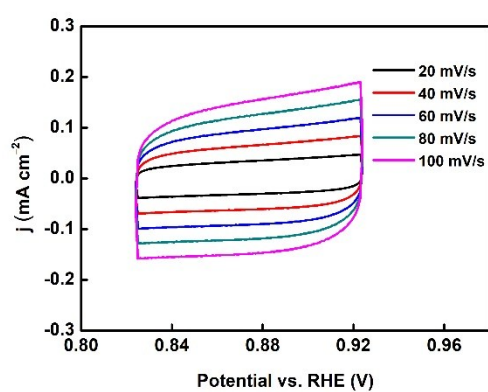

Figure S8 Cyclic voltammograms of the  $\text{Ni}(\text{OH})_2$  electrode at various scan rates.

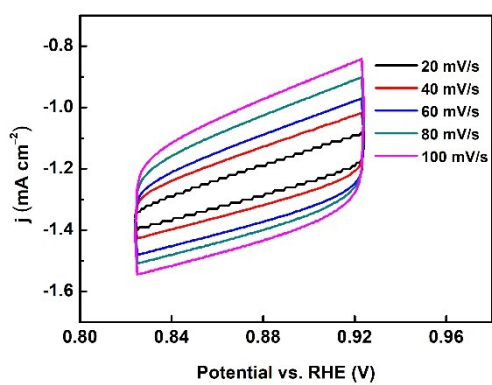

Figure S9 Cyclic voltammograms of the  $\text{Fe}_{0.3}\text{Ni}_{0.7}$  electrode at various scan rates.

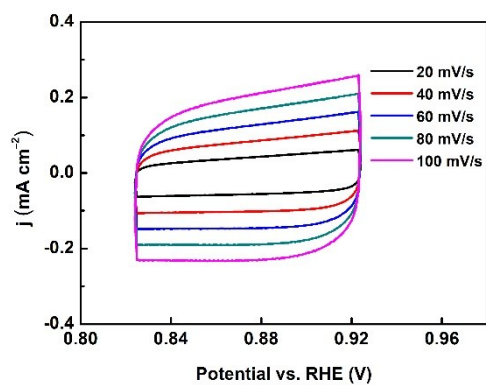

Figure S10 Cyclic voltammograms of the  $\text{Fe}_{0.5}\text{Ni}_{0.5}$  electrode at various scan rates.

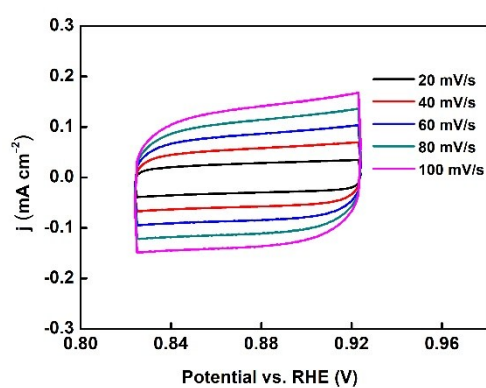

Figure S11 Cyclic voltammograms of the  $\text{Fe}_{0.7}\text{Ni}_{0.3}$  electrode at various scan rates.

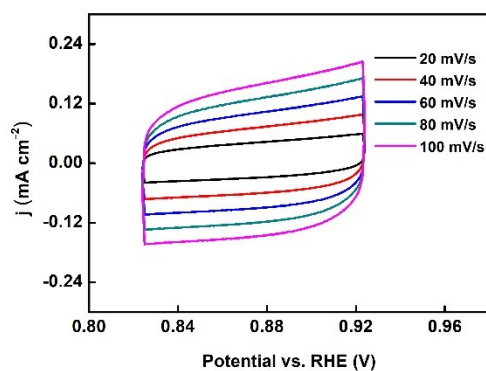

Figure S812 Cyclic voltammograms of the  $\text{FeOOH}$  electrode at various scan rates.

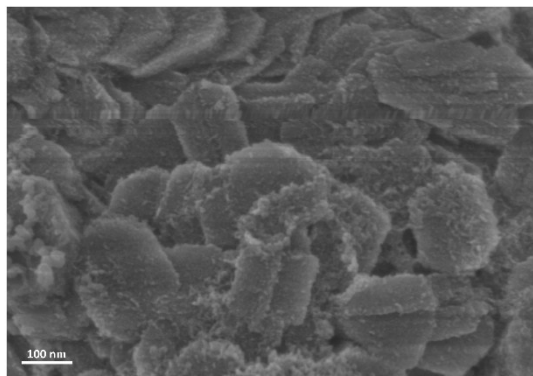

Figure S13 SEM image of the Fe<sub>0.3</sub>Ni<sub>0.7</sub> after long-term stability test.

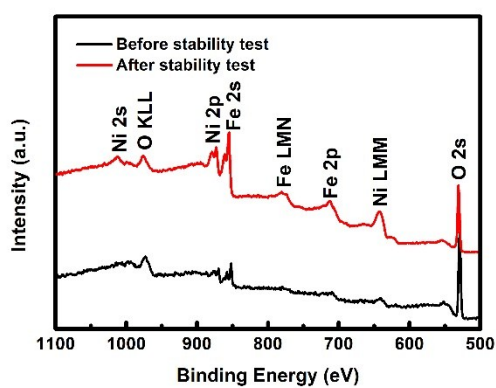

Figure S14 XPS survey spectra of the Fe<sub>0.3</sub>Ni<sub>0.7</sub> before and after long-term stability test.
